# Supplementary material
Source: MDPI journal article supplement (https://www.mdpi.com/2071-1050/15/4/3718)
Supplement: s1 [file s1]

Supplementary Material Table S1. Computation of exposed systems for the municipalities under study. Values are computed within the LECZ (Z= 10 m.a.s.l.), the RCP 8.5 projection (Z pro) and the Historical period 1985-2004 (Z His).

|                                             | Unit     | Period | ANTO   | COQU   | VIÑA   | VALP    | PICH  | TALC   | CORO   | ARAU   | SAAV   | VALD   | RAPA   | JFER   | Mean    |
|---------------------------------------------|----------|--------|--------|--------|--------|---------|-------|--------|--------|--------|--------|--------|--------|--------|---------|
| Exposed urban area                          | Km²      | Total  | 453,73 | 69,50  | 92,23  | 32,42   | 23,09 | 48,57  | 55,00  | 44,17  | 1,61   | 49,50  | 4,62   | 4,84   | -       |
|                                             |          | LECZ   | 8,71   | 4,19   | 4,26   | 2,31    | 4,14  | 9,47   | 16,28  | 14,96  | 1,18   | 26,02  | 0,45   | 0,13   | 7,68    |
|                                             |          | Z Pro  | 6,10   | 2,51   | 0,38   | 0,58    | 2,40  | 7,62   | 5,70   | 8,31   | 1,05   | 18,44  | 0,15   | 0,05   | 4,44    |
|                                             | %        | Z His  | 5,92   | 2,40   | 0,33   | 0,55    | 2,30  | 6,67   | 3,74   | 3,99   | 0,84   | 16,07  | 0,15   | 0,04   | 3,58    |
|                                             |          | LECZ   | 1,92   | 6,03   | 4,62   | 7,13    | 17,95 | 19,50  | 29,61  | 33,88  | 73,08  | 52,57  | 9,70   | 2,59   | 21,55   |
|                                             |          | Z Pro  | 1,34   | 3,61   | 0,41   | 1,79    | 10,38 | 15,70  | 10,36  | 18,82  | 65,49  | 37,26  | 3,33   | 0,96   | 14,12   |
|                                             |          | Z His  | 1,30   | 3,46   | 0,36   | 1,69    | 9,97  | 13,73  | 6,79   | 9,03   | 52,45  | 32,47  | 3,30   | 0,86   | 11,28   |
|                                             | Inhab    | Total  | 361873 | 22773  | 334248 | 296655  | 16394 | 151749 | 116262 | 36257  | 12450  | 166080 | 7750   | 926    | -       |
|                                             |          | LECZ   | 9253   | 14431  | 47849  | 1987    | 762   | 5457   | 1705   | 1867   | 154    | 15708  | 1941   | 155    | 8439,08 |
|                                             |          | Z Pro  | 7861   | 6571   | 196    | 1024    | 612   | 4980   | 1355   | 1609   | 78     | 11229  | 925    | 63     | 3041,92 |
| Exposed population                          | %        | Z His  | 7060   | 6081   | 152    | 1004    | 591   | 4809   | 1022   | 1585   | 78     | 9767   | 663    | 50     | 2738,50 |
|                                             |          | LECZ   | 0,03   | 0,06   | 0,14   | 0,01    | 0,05  | 0,04   | 0,01   | 0,05   | 0,01   | 0,09   | 0,25   | 0,17   | 0,08    |
|                                             |          | Z Pro  | 2,17   | 2,89   | 0,06   | 0,35    | 3,73  | 3,28   | 1,17   | 4,44   | 0,63   | 6,76   | 11,94  | 6,80   | 3,68    |
|                                             | Z His    | 1,95   | 2,67   | 0,05   | 0,34   | 3,60    | 3,17  | 0,88   | 4,37   | 0,63   | 5,88   | 8,55   | 5,40   | 3,12   |         |
| Floodable area defined as risky in CRP      | Km²      | LECZ   | 0,00   | 4,19   |        |         |       |        | 15,54  | 8,54   |        |        |        | 0,13   | 2,37    |
|                                             |          | Z Pro  | 0,00   | 2,51   | (*)    | (*)     | (*)   | (*)    | 5,70   | 4,52   | (*)    | (*)    | (*)    | 0,05   | 1,06    |
|                                             |          | Z His  | 0,00   | 2,40   |        |         |       |        | 3,74   | 2,07   |        |        |        | 0,04   | 0,69    |
|                                             | %        | LECZ   | 0,00   | 99,91  |        |         |       |        | 95,43  | 57,04  |        |        |        | 100,00 | 29,37   |
|                                             |          | Z Pro  | 0,00   | 100,00 | (*)    | (*)     | (*)   | (*)    | 100,00 | 54,38  | (*)    | (*)    | (*)    | 100,00 | 29,53   |
|                                             |          | Z His  | 0,00   | 100,00 |        |         |       |        | 100,00 | 51,90  |        |        |        | 100,00 | 29,32   |
|                                             | Total    | 470    | 391    | 411    | 449    | 94      | 344   | 344    | 525    | 110    | 428    | 64     | 15     | -      |         |
| Exposed critical facilities                 | Count    | LECZ   | 39     | 39     | 44     | 22      | 21    | 59     | 30     | 19     | 7      | 54     | 5      | 7      | 28,83   |
|                                             |          | Z Pro  | 21     | 26     | 4      | 12      | 12    | 52     | 27     | 14     | 7      | 40     | 4      | 1      | 18,33   |
|                                             |          | Z His  | 21     | 26     | 2      | 12      | 12    | 50     | 22     | 14     | 4      | 40     | 4      | 1      | 17,33   |
|                                             | %        | LECZ   | 8,30   | 9,97   | 10,71  | 4,90    | 22,34 | 17,15  | 8,72   | 3,62   | 6,36   | 12,62  | 7,81   | 46,67  | 13,26   |
|                                             |          | Z Pro  | 4,47   | 6,65   | 0,97   | 2,67    | 12,77 | 15,12  | 7,85   | 2,67   | 6,36   | 9,35   | 6,25   | 6,67   | 6,82    |
|                                             | Z His    | 4,47   | 6,65   | 0,49   | 2,67   | 12,77   | 14,53 | 6,40   | 2,67   | 3,64   | 9,35   | 6,25   | 6,67   | 6,38   |         |
| Exposed wetland area                        | Km²      | Total  | 0,13   | 0,98   | 0,31   | 0,04    | 1,76  | 3,85   | 3,49   | 6,67   | 0,09   | 8,11   | 0,00   | 0,00   | -       |
|                                             |          | LECZ   | 0,01   | 0,26   | 0,15   | 0,00    | 0,63  | 1,28   | 0,31   | 2,72   | 0,03   | 4,77   | 0,00   | 0,00   | 0,85    |
|                                             |          | Z Pro  | 0,01   | 0,20   | 0,03   | 0,00    | 0,38  | 1,01   | 0,18   | 1,83   | 0,08   | 4,99   | 0,00   | 0,00   | 0,73    |
|                                             | %        | Z His  | 0,01   | 0,19   | 0,02   | 0,00    | 0,37  | 0,95   | 0,05   | 1,37   | 0,08   | 3,97   | 0,00   | 0,00   | 0,58    |
|                                             |          | LECZ   | 7,06   | 26,77  | 47,06  | 0,00    | 35,86 | 33,29  | 8,90   | 40,77  | 40,47  | 58,80  | 0,00   | 0,00   | 24,91   |
|                                             |          | Z Pro  | 7,51   | 20,32  | 8,04   | 0,00    | 21,72 | 26,35  | 5,11   | 27,48  | 94,19  | 61,54  | 0,00   | 0,00   | 22,69   |
|                                             |          | Z His  | 7,51   | 19,31  | 6,11   | 0,00    | 20,87 | 24,59  | 1,49   | 20,46  | 94,19  | 48,96  | 0,00   | 0,00   | 20,29   |
| CRP Density in exposed urban area           | inhab/ha | LECZ   | 333,56 | 308,94 | 721,27 | 1303,50 | 62,50 | 419,84 | 201,26 | 219,33 | 158,00 | 120,85 | 84,40  | 164,00 | 341,45  |
|                                             |          | Z Pro  | 349,23 | 325,00 | 645,25 | 1150,16 | 96,25 | 439,44 | 210,66 | 166,57 | 158,00 | 140,52 | 105,50 | 0,00   | 315,55  |
|                                             |          | Z His  | 349,23 | 325,00 | 432,50 | 1150,16 | 96,25 | 457,02 | 251,72 | 166,57 | 276,50 | 136,75 | 105,50 | 0,00   | 312,27  |
| Census Density (2017) in exposed urban area | inhab/ha | LECZ   | 45,76  | 215,20 | 220,62 | 297,07  | 20,58 | 37,31  | 31,97  | 89,54  | 24,81  | 173,50 | 74,73  | 18,89  | 104,17  |
|                                             |          | Z Pro  | 50,19  | 170,22 | 305,34 | 130,42  | 67,38 | 32,74  | 27,60  | 19,76  | 2,72   | 178,67 | 128,26 | 6,36   | 93,31   |
|                                             |          | Z His  | 54,33  | 168,41 | 60,64  | 210,55  | 80,21 | 35,65  | 37,51  | 26,88  | 4,76   | 266,35 | 76,82  | 5,74   | 85,65   |

(\*) Floodable area is not defined as risky in CRP

Max. and Min. value range
