# Supplementary material
Source: MDPI journal article supplement (https://www.mdpi.com/2071-1050/15/4/3718)
Supplement: s1 [file s1]

Supplementary Material Table S2. Calculation of the potential densification ratio, based on the CRP areas allowed for residential land use within the LECZ (Z= 10 m.a.s.l. ), the RCP 8.5 projection (Z pro) and the historical period 1985-2004 (Z His).

| Case Study | CRP residential zones | Area      |           |           | Population   |              |              | Maximum CRP population density inhab/ha | Existing population density      |                                  |                                  | Densification Potential Ratio |        |        |
|------------|-----------------------|-----------|-----------|-----------|--------------|--------------|--------------|-----------------------------------------|----------------------------------|----------------------------------|----------------------------------|-------------------------------|--------|--------|
|            |                       | Zhis (ha) | Zpro (ha) | LECZ (ha) | ZHis (inhab) | Zpro (inhab) | LECZ (inhab) |                                         | Population density ZHis inhab/ha | Population density ZPro inhab/ha | Population density LECZ inhab/ha | Zhis                          | Zpro   | LECZ   |
| ANTO       | 1                     | 4,1       | 4,9       | 20,6      | 12           | 12           | 24           | 1527,0                                  | 2,9                              | 2,5                              | 1,2                              | 527,8                         | 622,8  | 1308,8 |
|            | 2                     | 2,1       | 2,4       | 13,5      | 782          | 782          | 931          | 436,0                                   | 380,7                            | 321,9                            | 68,9                             | 1,1                           | 1,4    | 6,3    |
|            | 3                     | 0,0       | 0,0       | 0,7       | 0            | 0            | 34           | 851,0                                   | 0,0                              | 0,0                              | 47,2                             | 0,0                           | 0,0    | 18,0   |
|            | 4                     | 4,8       | 4,8       | 4,8       | 215          | 215          | 215          | 851,0                                   | 44,9                             | 44,9                             | 44,9                             | 18,9                          | 18,9   | 18,9   |
|            | 5                     | 0,0       | 0,0       | 1,0       | 0            | 0            | 38           | 319,0                                   | 0,0                              | 0,0                              | 39,1                             | 0,0                           | 0,0    | 8,2    |
|            | 6                     | 6,6       | 7,7       | 32,5      | 240          | 280          | 301          | 2225,0                                  | 36,1                             | 36,2                             | 9,3                              | 61,6                          | 61,5   | 240,2  |
|            | 7                     | 3,3       | 3,7       | 25,5      | 1521         | 1521         | 1773         | 510,0                                   | 467,0                            | 409,8                            | 69,4                             | 1,1                           | 1,2    | 7,3    |
|            | 8                     | 0,0       | 0,0       | 2,3       | 0            | 0            | 76           | 213,0                                   | 0,0                              | 0,0                              | 33,0                             | 0,0                           | 0,0    | 6,4    |
|            | 9                     | 1,9       | 2,1       | 5,7       | 34           | 34           | 34           | 1276,0                                  | 17,8                             | 16,3                             | 6,0                              | 71,8                          | 78,1   | 213,9  |
|            | 10                    | 10,0      | 10,4      | 12,1      | 542          | 582          | 605          | 250,0                                   | 54,4                             | 55,9                             | 50,2                             | 4,6                           | 4,5    | 5,0    |
|            | 11                    | 61,2      | 63,4      | 104,2     | 3240         | 3930         | 3996         | 250,0                                   | 53,0                             | 62,0                             | 38,4                             | 4,7                           | 4,0    | 6,5    |
|            | 12                    | 6,6       | 6,8       | 12,5      | 19           | 19           | 19           | 42,0                                    | 2,9                              | 2,8                              | 1,5                              | 14,5                          | 15,0   | 27,6   |
|            | 13                    | 1,2       | 1,3       | 9,9       | 0            | 19           | 19           | 213,0                                   | 0,0                              | 14,9                             | 1,9                              | 0,0                           | 14,3   | 111,4  |
|            | 14                    | 0,0       | 0,0       | 2,6       | 0            | 0            | 390          | 511,0                                   | 0,0                              | 0,0                              | 149,2                            | 0,0                           | 0,0    | 3,4    |
|            | 15                    | 0,1       | 0,2       | 2,8       | 72           | 84           | 166          | 851,0                                   | 487,5                            | 462,0                            | 59,4                             | 1,7                           | 1,8    | 14,3   |
| COQU       | 16                    | 0,0       | 0,0       | 0,5       | 0            | 0            | 13           | 250,0                                   | 0,0                              | 0,0                              | 28,6                             | 0,0                           | 0,0    | 8,7    |
|            | 17                    | 0,2       | 0,3       | 2,2       | 69           | 69           | 69           | 400,0                                   | 344,5                            | 275,4                            | 30,9                             | 1,2                           | 1,5    | 12,9   |
|            | 18                    | 0,4       | 0,4       | 1,5       | 0            | 0            | 11           | 750,0                                   | 0,0                              | 0,0                              | 7,4                              | 0,0                           | 0,0    | 101,5  |
|            | 19                    | 1,5       | 1,6       | 5,8       | 256          | 256          | 256          | 80,0                                    | 168,6                            | 160,9                            | 44,3                             | 0,5                           | 0,5    | 1,8    |
|            | 20                    | 0,0       | 0,0       | 2,1       | 0            | 0            | 159          | 20,0                                    | 0,0                              | 0,0                              | 77,5                             | 0,0                           | 0,0    | 0,3    |
|            | 21                    | 0,0       | 0,0       | 0,8       | 0            | 0            | 159          | 20,0                                    | 0,0                              | 0,0                              | 187,9                            | 0,0                           | 0,0    | 0,1    |
|            | 22                    | 9,1       | 9,6       | 20,6      | 182          | 182          | 339          | 280,0                                   | 20,0                             | 19,0                             | 16,4                             | 14,0                          | 14,7   | 17,0   |
|            | 23                    | 0,0       | 0,0       | 0,0       | 0            | 0            | 2            | 280,0                                   | 0,0                              | 0,0                              | 181,8                            | 0,0                           | 0,0    | 1,5    |
|            | 24                    | 0,0       | 0,0       | 14,3      | 0            | 0            | 28           | 800,0                                   | 0,0                              | 0,0                              | 2,0                              | 0,0                           | 0,0    | 409,1  |
|            | 25                    | 11,3      | 12,6      | 34,2      | 7            | 7            | 7            | 800,0                                   | 0,6                              | 0,6                              | 0,2                              | 1292,3                        | 1445,2 | 3904,6 |
|            | 26                    | 0,0       | 0,0       | 1,9       | 0            | 0            | 404          | 600,0                                   | 0,0                              | 0,0                              | 209,5                            | 0,0                           | 0,0    | 2,9    |
|            | 27                    | 14,4      | 15,6      | 22,7      | 944          | 944          | 1357         | 1000,0                                  | 65,4                             | 60,4                             | 59,7                             | 15,3                          | 16,5   | 16,8   |
|            | 28                    | 10,4      | 11,6      | 32,8      | 170          | 186          | 232          | 450,0                                   | 16,4                             | 16,1                             | 7,1                              | 27,4                          | 28,0   | 63,6   |
|            | 29                    | 0,4       | 0,5       | 2,6       | 320          | 706          | 822          | 450,0                                   | 852,2                            | 1380,3                           | 320,1                            | 0,5                           | 0,3    | 1,4    |
|            | 30                    | 4,5       | 4,8       | 6,4       | 1496         | 1584         | 3162         | 450,0                                   | 331,3                            | 332,3                            | 494,2                            | 1,4                           | 1,4    | 0,9    |
|            | 31                    | 12,5      | 13,3      | 13,3      | 94           | 94           | 94           | 600,0                                   | 7,5                              | 7,1                              | 7,1                              | 79,9                          | 84,8   | 84,8   |
|            | 32                    | 0,0       | 0,0       | 0,9       | 0            | 0            | 79           | 500,0                                   | 0,0                              | 0,0                              | 87,3                             | 0,0                           | 0,0    | 5,7    |
|            | 33                    | 0,0       | 0,0       | 0,1       | 0            | 0            | 63           | 500,0                                   | 0,0                              | 0,0                              | 533,0                            | 0,0                           | 0,0    | 0,9    |
|            | 34                    | 0,0       | 0,0       | 0,0       | 0            | 0            | 35           | 80,0                                    | 0,0                              | 0,0                              | 765,9                            | 0,0                           | 0,0    | 0,1    |
|            | 35                    | 0,6       | 0,7       | 2,6       | 26           | 26           | 46           | 40,0                                    | 42,1                             | 38,4                             | 17,5                             | 0,9                           | 1,0    | 2,3    |
|            | 36                    | 15,4      | 16,9      | 40,3      | 577          | 577          | 695          | 800,0                                   | 37,4                             | 34,1                             | 17,2                             | 21,4                          | 23,5   | 46,4   |
|            | 37                    | 0,0       | 0,1       | 4,5       | 0            | 0            | 1121         | 800,0                                   | 0,0                              | 0,0                              | 248,5                            | 0,0                           | 0,0    | 3,2    |
|            | 38                    | 5,7       | 6,0       | 7,9       | 908          | 908          | 3323         | 800,0                                   | 158,2                            | 151,3                            | 418,1                            | 5,1                           | 5,3    | 1,9    |
|            | 39                    | 0,0       | 0,0       | 0,1       | 0            | 0            | 73           | 240,0                                   | 0,0                              | 0,0                              | 1334,6                           | 0,0                           | 0,0    | 0,2    |
| VIÑA       | 40                    | 0,0       | 0,0       | 27,6      | 0            | 0            | 4715         | 865,0                                   | 0,0                              | 0,0                              | 170,7                            | 0,0                           | 0,0    | 5,1    |
|            | 41                    | 0,0       | 0,0       | 0,4       | 0            | 0            | 87           | 800,0                                   | 0,0                              | 0,0                              | 208,8                            | 0,0                           | 0,0    | 3,8    |
|            | 42                    | 1,3       | 5,0       | 8,1       | 152          | 152          | 178          | 865,0                                   | 121,3                            | 30,6                             | 21,9                             | 7,1                           | 28,3   | 39,4   |
|            | 43                    | 0,0       | 0,0       | 0,8       | 0            | 32           | 92           | 865,0                                   | 0,0                              | 796,0                            | 116,7                            | 0,0                           | 1,1    | 7,4    |
|            | 44                    | 0,0       | 0,0       | 1,0       | 0            | 0            | 46           | 851,0                                   | 0,0                              | 0,0                              | 45,1                             | 0,0                           | 0,0    | 18,9   |
|            | 45                    | 0,0       | 0,0       | 24,7      | 0            | 0            | 5428         | 851,0                                   | 0,0                              | 0,0                              | 219,9                            | 0,0                           | 0,0    | 3,9    |
|            | 46                    | 0,0       | 0,0       | 5,9       | 0            | 0            | 556          | 851,0                                   | 0,0                              | 0,0                              | 94,1                             | 0,0                           | 0,0    | 9,0    |
|            | 47                    | 0,0       | 0,0       | 65,4      | 0            | 12           | 11547        | 851,0                                   | 0,0                              | 394,7                            | 176,6                            | 0,0                           | 2,2    | 4,8    |
|            | 48                    | 0,0       | 0,0       | 16,2      | 0            | 0            | 3232         | 851,0                                   | 0,0                              | 0,0                              | 199,9                            | 0,0                           | 0,0    | 4,3    |
|            | 49                    | 0,0       | 0,0       | 5,1       | 0            | 0            | 11           | 1200,0                                  | 0,0                              | 0,0                              | 2,2                              | 0,0                           | 0,0    | 552,7  |
|            | 50                    | 0,0       | 0,0       | 4,1       | 0            | 0            | 11           | 1200,0                                  | 0,0                              | 0,0                              | 2,7                              | 0,0                           | 0,0    | 446,0  |
|            | 51                    | 0,0       | 0,0       | 4,4       | 0            | 0            | 787          | 350,0                                   | 0,0                              | 0,0                              | 177,3                            | 0,0                           | 0,0    | 2,0    |
|            | 52                    | 0,0       | 0,0       | 1,3       | 0            | 0            | 1160         | 350,0                                   | 0,0                              | 0,0                              | 911,9                            | 0,0                           | 0,0    | 0,4    |
|            | 53                    | 0,0       | 0,0       | 3,3       | 0            | 0            | 318          | 350,0                                   | 0,0                              | 0,0                              | 95,8                             | 0,0                           | 0,0    | 3,7    |
|            | 54                    | 0,0       | 0,0       | 10,2      | 0            | 0            | 73           | 2600,0                                  | 0,0                              | 0,0                              | 7,1                              | 0,0                           | 0,0    | 365,0  |
|            | 55                    | 0,0       | 0,0       | 12,2      | 0            | 0            | 13           | 2600,0                                  | 0,0                              | 0,0                              | 1,1                              | 0,0                           | 0,0    | 2432,8 |
|            | 56                    | 0,0       | 0,0       | 5,9       | 0            | 0            | 535          | 2600,0                                  | 0,0                              | 0,0                              | 90,4                             | 0,0                           | 0,0    | 28,8   |
|            | 57                    | 0,0       | 0,0       | 0,1       | 0            | 0            | 24           | 425,0                                   | 0,0                              | 0,0                              | 247,7                            | 0,0                           | 0,0    | 1,7    |
|            | 58                    | 0,0       | 0,0       | 6,5       | 0            | 0            | 489          | 851,0                                   | 0,0                              | 0,0                              | 75,7                             | 0,0                           | 0,0    | 11,2   |
|            | 59                    | 0,0       | 0,0       | 7,5       | 0            | 0            | 4602         | 865,0                                   | 0,0                              | 0,0                              | 617,3                            | 0,0                           | 0,0    | 1,4    |
|            | 60                    | 0,0       | 0,0       | 0,1       | 0            | 0            | 158          | 955,0                                   | 0,0                              | 0,0                              | 1463,0                           | 0,0                           | 0,0    | 0,7    |
|            | 61                    | 0,0       | 0,0       | 27,0      | 0            | 0            | 5251         | 851,0                                   | 0,0                              | 0,0                              | 194,5                            | 0,0                           | 0,0    | 4,4    |
| VALP       | 62                    | 0,0       | 0,0       | 1,8       | 0            | 0            | 81           | 3040,0                                  | 0,0                              | 0,0                              | 46,2                             | 0,0                           | 0,0    | 65,8   |
|            | 63                    | 3,1       | 3,8       | 7,7       | 370          | 370          | 383          | 5400,0                                  | 118,2                            | 97,9                             | 50,0                             | 45,7                          | 55,2   | 108,0  |
|            | 64                    | 0,0       | 0,0       | 0,0       | 0            | 0            | 24           | 1021,0                                  | 0,0                              | 0,0                              | 1371,4                           | 0,0                           | 0,0    | 0,7    |
|            | 65                    | 0,0       | 0,0       | 0,0       | 0            | 0            | 22           | 1021,0                                  | 0,0                              | 0,0                              | 1401,3                           | 0,0                           | 0,0    | 0,7    |
|            | 66                    | 0,0       | 0,0       | 1,3       | 0            | 0            | 153          | 1613,0                                  | 0,0                              | 0,0                              | 116,2                            | 0,0                           | 0,0    | 13,9   |
|            | 67                    | 0,1       | 0,2       | 0,9       | 164          | 164          | 164          | 1613,0                                  | 1437,3                           | 920,3                            | 187,2                            | 1,1                           | 1,8    | 8,6    |
|            | 68                    | 0,1       | 0,3       | 58,5      | 6            | 6            | 6            | 3045,0                                  | 41,2                             | 19,3                             | 0,1                              | 73,9                          | 157,8  | 70,3   |
|            | 69                    | 0,0       | 0,0       | 1,6       | 0            | 0            | 36           | 1613,0                                  | 0,0                              | 0,0                              | 22,9                             | 0,0                           | 0,0    | 70,3   |
|            | 70                    | 1,5       | 1,9       | 18,7      | 153          | 153          | 153          | 2940,0                                  | 100,2                            | 82,5                             | 8,2                              | 29,3                          | 35,6   | 359,0  |
|            | 71                    | 0,2       | 0,5       | 1,5       | 180          | 200          | 219          | 220,0                                   | 815,6                            | 433,2                            | 147,7                            | 0,3                           | 0,5    | 1,5    |
|            | 72                    | 0,9       | 1,3       | 9,5       | 6            | 6            | 6            | 350,0                                   | 6,6                              | 4,6                              | 0,6                              | 52,7                          | 75,8   | 551,8  |
|            | 73                    | 0,0       | 0,0       | 2,4       | 0            | 0            | 254          | 1613,0                                  | 0,0                              | 0,0                              | 105,7                            | 0,0                           | 0,0    | 15,3   |
|            | 74                    | 6,3       | 6,7       | 19,1      | 79           | 79           | 79           | 80,0                                    | 12,5                             | 11,8                             | 4,1                              | 6,4                           | 6,8    | 19,3   |
|            | 75                    | 1,2       | 1,3       | 7,4       | 62           | 62           | 62           | 40,0                                    | 52,1                             | 46,2                             | 8,4                              | 0,8                           | 0,9    | 4,8    |
|            | 76                    | 5,1       | 5,4       | 15,2      | 124          | 124          | 124          | 200,0                                   | 24,1                             | 22,9                             | 8,2                              | 8,3                           | 8,7    | 24,5   |

|      |     |       |       |       |     |     |      |        |        |        |        |        |        |        |
|------|-----|-------|-------|-------|-----|-----|------|--------|--------|--------|--------|--------|--------|--------|
| PICH | 77  | 0,6   | 0,6   | 11,0  | 74  | 86  | 99   | 60,0   | 133,0  | 133,3  | 9,0    | 0,5    | 0,5    | 6,7    |
|      | 78  | 0,0   | 0,0   | 1,1   | 0   | 0   | 13   | 60,0   | 0,0    | 0,0    | 11,8   | 0,0    | 0,0    | 5,1    |
|      | 79  | 0,2   | 0,3   | 5,9   | 17  | 17  | 17   | 60,0   | 70,0   | 52,4   | 2,9    | 0,9    | 1,1    | 20,9   |
|      | 80  | 0,8   | 0,9   | 3,6   | 47  | 56  | 66   | 655,0  | 60,9   | 63,6   | 18,6   | 10,8   | 10,3   | 35,3   |
| TALC | 81  | 7,0   | 8,1   | 3,4   | 28  | 32  | 32   | 655,0  | 4,0    | 4,0    | 9,5    | 164,7  | 165,2  | 69,0   |
|      | 82  | 0,1   | 0,2   | 5,7   | 0   | 0   | 192  | 131,0  | 0,0    | 0,0    | 33,5   | 0,0    | 0,0    | 3,9    |
|      | 83  | 3,5   | 4,3   | 5,9   | 33  | 33  | 33   | 264,0  | 9,5    | 7,6    | 5,6    | 27,9   | 34,8   | 47,4   |
|      | 84  | 3,0   | 3,0   | 3,0   | 127 | 127 | 127  | 280,0  | 42,0   | 42,0   | 42,0   | 6,7    | 6,7    | 6,7    |
|      | 85  | 2,7   | 3,5   | 6,4   | 586 | 636 | 636  | 785,0  | 216,7  | 181,9  | 99,0   | 3,6    | 4,3    | 7,9    |
|      | 86  | 4,4   | 4,4   | 3,6   | 15  | 15  | 15   | 1571,0 | 3,4    | 3,4    | 4,2    | 458,2  | 458,2  | 375,4  |
|      | 87  | 0,3   | 0,5   | 1,2   | 0   | 0   | 43   | 419,0  | 0,0    | 0,0    | 37,2   | 0,0    | 0,0    | 11,3   |
|      | 88  | 15,6  | 15,6  | 7,2   | 105 | 105 | 105  | 589,0  | 6,7    | 6,7    | 14,7   | 87,3   | 87,3   | 40,2   |
|      | 89  | 3,2   | 3,6   | 4,2   | 214 | 214 | 248  | 280,0  | 66,3   | 60,0   | 58,4   | 4,2    | 4,7    | 4,8    |
|      | 90  | 13,2  | 15,8  | 20,1  | 19  | 19  | 19   | 1288,0 | 1,4    | 1,2    | 0,9    | 896,4  | 1068,4 | 1364,9 |
|      | 91  | 0,0   | 0,0   | 0,5   | 0   | 0   | 42   | 960,0  | 0,0    | 0,0    | 76,6   | 0,0    | 0,0    | 12,5   |
|      | 92  | 0,0   | 0,0   | 0,0   | 0   | 0   | 3    | 960,0  | 0,0    | 0,0    | 181,8  | 0,0    | 0,0    | 5,3    |
|      | 93  | 23,7  | 24,8  | 24,8  | 368 | 368 | 368  | 1120,0 | 15,5   | 14,8   | 14,8   | 72,2   | 75,5   | 75,5   |
|      | 94  | 10,8  | 11,6  | 11,6  | 172 | 189 | 189  | 932,0  | 16,0   | 16,3   | 16,3   | 58,3   | 57,3   | 57,4   |
|      | 95  | 5,6   | 6,7   | 6,7   | 97  | 97  | 97   | 280,0  | 17,4   | 14,4   | 14,4   | 16,1   | 19,4   | 19,4   |
|      | 96  | 7,7   | 8,3   | 32,1  | 398 | 398 | 398  | 700,0  | 51,9   | 47,9   | 12,4   | 13,5   | 14,6   | 56,5   |
|      | 97  | 47,1  | 59,6  | 70,8  | 287 | 287 | 287  | 589,0  | 6,1    | 4,8    | 4,1    | 96,6   | 122,2  | 145,3  |
|      | 98  | 22,0  | 22,0  | 22,0  | 0   | 0   | 17   | 2291,0 | 0,0    | 0,0    | 0,8    | 0,0    | 0,0    | 2964,8 |
|      | 99  | 45,7  | 45,8  | 46,6  | 43  | 43  | 43   | 916,0  | 0,9    | 0,9    | 0,9    | 973,6  | 975,5  | 993,1  |
|      | 100 | 1,1   | 1,2   | 2,2   | 104 | 104 | 140  | 785,0  | 94,4   | 84,3   | 63,8   | 8,3    | 9,3    | 12,3   |
|      | 101 | 29,0  | 30,7  | 34,8  | 17  | 17  | 17   | 785,0  | 0,6    | 0,6    | 0,5    | 1340,5 | 1418,5 | 1606,4 |
| CORO | 102 | 0,2   | 0,2   | 0,7   | 0   | 0   | 30   | 785,0  | 0,0    | 0,0    | 42,8   | 0,0    | 0,0    | 18,3   |
|      | 103 | 0,4   | 0,4   | 0,4   | 274 | 274 | 4    | 927,0  | 645,6  | 645,6  | 9,5    | 1,4    | 1,4    | 97,3   |
|      | 104 | 21,9  | 22,5  | 22,5  | 105 | 105 | 105  | 1178,0 | 4,8    | 4,7    | 4,7    | 245,9  | 252,7  | 252,4  |
|      | 105 | 6,6   | 6,6   | 6,6   | 15  | 15  | 15   | 589,0  | 2,3    | 2,3    | 2,3    | 259,9  | 259,9  | 259,9  |
|      | 106 | 12,0  | 12,3  | 15,4  | 8   | 8   | 8    | 1178,0 | 0,7    | 0,7    | 0,5    | 1763,5 | 1803,9 | 2273,1 |
|      | 107 | 2,4   | 2,5   | 2,8   | 120 | 120 | 120  | 655,0  | 50,0   | 48,6   | 43,5   | 13,1   | 13,5   | 15,1   |
|      | 108 | 3,0   | 3,0   | 3,0   | 105 | 105 | 105  | 196,0  | 34,7   | 34,7   | 35,0   | 5,6    | 5,6    | 5,6    |
|      | 109 | 8,3   | 9,0   | 10,0  | 51  | 51  | 51   | 785,0  | 6,1    | 5,7    | 5,1    | 128,0  | 138,5  | 153,9  |
|      | 110 | 14,1  | 14,1  | 14,1  | 26  | 26  | 26   | 200,0  | 1,8    | 1,8    | 1,8    | 108,3  | 108,3  | 108,3  |
|      | 111 | 6,6   | 8,8   | 15,1  | 26  | 26  | 56   | 175,0  | 3,9    | 3,0    | 3,7    | 44,3   | 59,2   | 47,1   |
| ARAU | 112 | 25,1  | 25,8  | 32,8  | 28  | 38  | 43   | 500,0  | 1,1    | 1,5    | 1,3    | 447,7  | 339,4  | 381,1  |
|      | 113 | 2,0   | 2,3   | 9,7   | 32  | 56  | 74   | 600,0  | 16,3   | 24,1   | 7,7    | 36,9   | 24,9   | 78,3   |
|      | 114 | 0,0   | 0,0   | 19,5  | 0   | 0   | 14   | 350,0  | 0,0    | 0,0    | 0,7    | 0,0    | 0,0    | 486,9  |
|      | 115 | 5,4   | 5,9   | 154,3 | 78  | 78  | 125  | 600,0  | 14,4   | 13,1   | 0,8    | 41,8   | 45,7   | 740,7  |
|      | 116 | 1,8   | 9,4   | 94,1  | 0   | 182 | 182  | 200,0  | 0,0    | 19,5   | 1,9    | 0,0    | 10,3   | 103,4  |
| SAAV | 117 | 0,0   | 0,0   | 0,5   | 0   | 0   | 62   | 306,0  | 0,0    | 0,0    | 135,3  | 0,0    | 0,0    | 2,3    |
|      | 118 | 8,7   | 23,0  | 38,5  | 62  | 86  | 86   | 655,0  | 7,1    | 3,7    | 2,2    | 92,0   | 175,1  | 293,1  |
|      | 119 | 2,3   | 2,6   | 6,5   | 62  | 62  | 62   | 982,0  | 26,6   | 24,3   | 9,5    | 36,9   | 40,5   | 103,0  |
|      | 120 | 0,0   | 0,0   | 3,7   | 0   | 0   | 10   | 1310,0 | 0,0    | 0,0    | 2,7    | 0,0    | 0,0    | 483,9  |
|      | 121 | 0,6   | 0,9   | 16,2  | 195 | 195 | 195  | 655,0  | 319,1  | 225,1  | 12,0   | 2,1    | 2,9    | 54,4   |
| VALD | 122 | 34,2  | 34,2  | 35,0  | 12  | 12  | 14   | 1106,0 | 0,4    | 0,4    | 0,4    | 3154,1 | 3154,1 | 2765,0 |
|      | 123 | 0,0   | 0,0   | 1,5   | 0   | 0   | 958  | 170,0  | 0,0    | 0,0    | 643,3  | 0,0    | 0,0    | 0,3    |
|      | 124 | 0,0   | 0,0   | 1,9   | 0   | 0   | 954  | 125,0  | 0,0    | 0,0    | 494,5  | 0,0    | 0,0    | 0,3    |
|      | 125 | 0,0   | 0,0   | 0,2   | 0   | 0   | 71   | 100,0  | 0,0    | 0,0    | 313,9  | 0,0    | 0,0    | 0,3    |
|      | 126 | 0,1   | 0,1   | 0,2   | 330 | 330 | 350  | 50,0   | 3832,8 | 3832,8 | 2269,8 | 0,0    | 0,0    | 0,0    |
|      | 127 | 0,2   | 0,2   | 0,6   | 345 | 345 | 345  | 150,0  | 2053,6 | 2053,6 | 559,9  | 0,1    | 0,1    | 0,3    |
|      | 128 | 0,8   | 0,8   | 1,5   | 12  | 12  | 12   | 20,0   | 15,0   | 15,0   | 7,9    | 1,3    | 1,3    | 2,5    |
|      | 129 | 0,8   | 1,2   | 25,5  | 95  | 105 | 105  | 229,0  | 116,6  | 90,2   | 4,1    | 2,0    | 2,5    | 55,7   |
|      | 130 | 0,0   | 0,0   | 1,5   | 0   | 0   | 31   | 30,0   | 0,0    | 0,0    | 20,2   | 0,0    | 0,0    | 1,5    |
|      | 131 | 86,0  | 86,4  | 90,0  | 31  | 31  | 31   | 160,0  | 0,4    | 0,4    | 0,3    | 443,7  | 446,0  | 464,5  |
|      | 132 | 14,5  | 15,8  | 43,9  | 285 | 285 | 304  | 30,0   | 19,6   | 18,0   | 6,9    | 1,5    | 1,7    | 4,3    |
|      | 133 | 1,3   | 1,6   | 4,3   | 99  | 99  | 99   | 30,0   | 74,4   | 63,7   | 23,3   | 0,4    | 0,5    | 1,3    |
|      | 134 | 0,4   | 31,0  | 87,6  | 324 | 856 | 1062 | 160,0  | 838,7  | 27,6   | 12,1   | 0,2    | 5,8    | 13,2   |
|      | 135 | 0,1   | 1,7   | 52,1  | 160 | 462 | 592  | 210,0  | 2739,7 | 271,0  | 11,4   | 0,1    | 0,8    | 18,5   |
|      | 136 | 0,0   | 0,0   | 2,2   | 0   | 0   | 407  | 160,0  | 0,0    | 0,0    | 189,1  | 0,0    | 0,0    | 0,8    |
|      | 137 | 1,4   | 3,3   | 12,6  | 259 | 259 | 259  | 30,0   | 189,7  | 78,2   | 20,5   | 0,2    | 0,4    | 1,5    |
|      | 138 | 2,7   | 6,8   | 64,9  | 208 | 208 | 208  | 15,0   | 76,8   | 30,7   | 3,2    | 0,2    | 0,5    | 4,7    |
|      | 139 | 6,9   | 12,7  | 76,1  | 129 | 129 | 129  | 262,0  | 18,6   | 10,1   | 1,7    | 14,1   | 25,9   | 154,5  |
|      | 140 | 28,5  | 38,8  | 31,8  | 165 | 165 | 165  | 393,0  | 5,8    | 4,3    | 5,2    | 67,9   | 92,4   | 75,7   |
|      | 141 | 1,5   | 2,2   | 8,3   | 102 | 102 | 129  | 393,0  | 67,4   | 46,3   | 15,5   | 5,8    | 8,5    | 25,4   |
|      | 142 | 8,5   | 8,9   | 12,3  | 40  | 40  | 40   | 327,0  | 4,7    | 4,5    | 3,3    | 69,3   | 72,9   | 100,3  |
| RAPA | 143 | 10,2  | 14,3  | 20,5  | 69  | 69  | 69   | 435,0  | 6,7    | 4,8    | 3,4    | 64,5   | 90,2   | 129,2  |
|      | 144 | 0,0   | 3,5   | 28,8  | 0   | 120 | 222  | 393,0  | 0,0    | 34,7   | 7,7    | 0,0    | 11,3   | 51,0   |
|      | 145 | 123,9 | 136,4 | 273,5 | 26  | 26  | 46   | 321,0  | 0,2    | 0,2    | 0,2    | 1529,4 | 1684,1 | 1908,5 |
|      | 146 | 3,0   | 3,0   | 3,0   | 495 | 495 | 495  | 603,0  | 167,0  | 167,0  | 165,0  | 3,6    | 3,6    | 3,7    |
|      | 147 | 65,7  | 67,5  | 68,1  | 31  | 31  | 31   | 393,0  | 0,5    | 0,5    | 0,5    | 832,6  | 855,2  | 863,2  |
|      | 148 | 140,5 | 151,4 | 228,0 | 28  | 28  | 28   | 20,0   | 0,2    | 0,2    | 0,1    | 100,4  | 108,1  | 162,9  |
|      | 149 | 21,8  | 21,8  | 17,4  | 369 | 369 | 369  | 522,0  | 16,9   | 16,9   | 21,2   | 30,8   | 30,8   | 24,6   |
|      | 150 | 22,0  | 22,5  | 25,5  | 129 | 129 | 129  | 522,0  | 5,9    | 5,7    | 5,1    | 89,0   | 90,9   | 103,3  |
|      | 151 | 0,0   | 0,1   | 11,3  | 0   | 65  | 485  | 320,0  | 0,0    | 782,2  | 43,1   | 0,0    | 0,4    | 7,4    |
|      | 152 | 2,1   | 2,1   | 9,5   | 53  | 53  | 419  | 262,0  | 25,8   | 25,5   | 44,2   | 10,2   | 10,3   | 5,9    |
| JFER | 153 | 1,2   | 1,3   | 11,9  | 302 | 564 | 864  | 160,0  | 243,2  | 449,6  | 72,3   | 0,7    | 0,4    | 2,2    |
|      | 154 | 0,0   | 0,0   | 0,2   | 0   | 0   | 2    | 100,0  | 0,0    | 0,0    | 8,8    | 0,0    | 0,0    | 11,3   |
|      | 155 | 0,0   | 0,0   | 2,6   | 0   | 0   | 50   | 655,0  | 0,0    | 0,0    | 19,0   | 0,0    | 0,0    | 34,4   |
|      | 156 | 0,0   | 0,0   | 0,4   | 0   | 0   | 14   | 393,0  | 0,0    | 0,0    | 32,0   | 0,0    | 0,0    | 12,3   |
